# Supplementary material for: Structural basis for ligand recognition of the neuropeptide Y Y2 receptor
Source: PubMed Central journal article supplement (PMC7854658; doi:10.1038/s41467-021-21030-9), 2021-02-02
Supplement: 41467_2021_21030_MOESM1_ESM.pdf [file 41467_2021_21030_MOESM1_ESM.pdf]

**Supplementary Information**

**for**

**Structural basis for ligand recognition of the neuropeptide Y Y<sub>2</sub>  
receptor**

Tingting Tang, Christin Hartig, et al.

## Supplementary Information

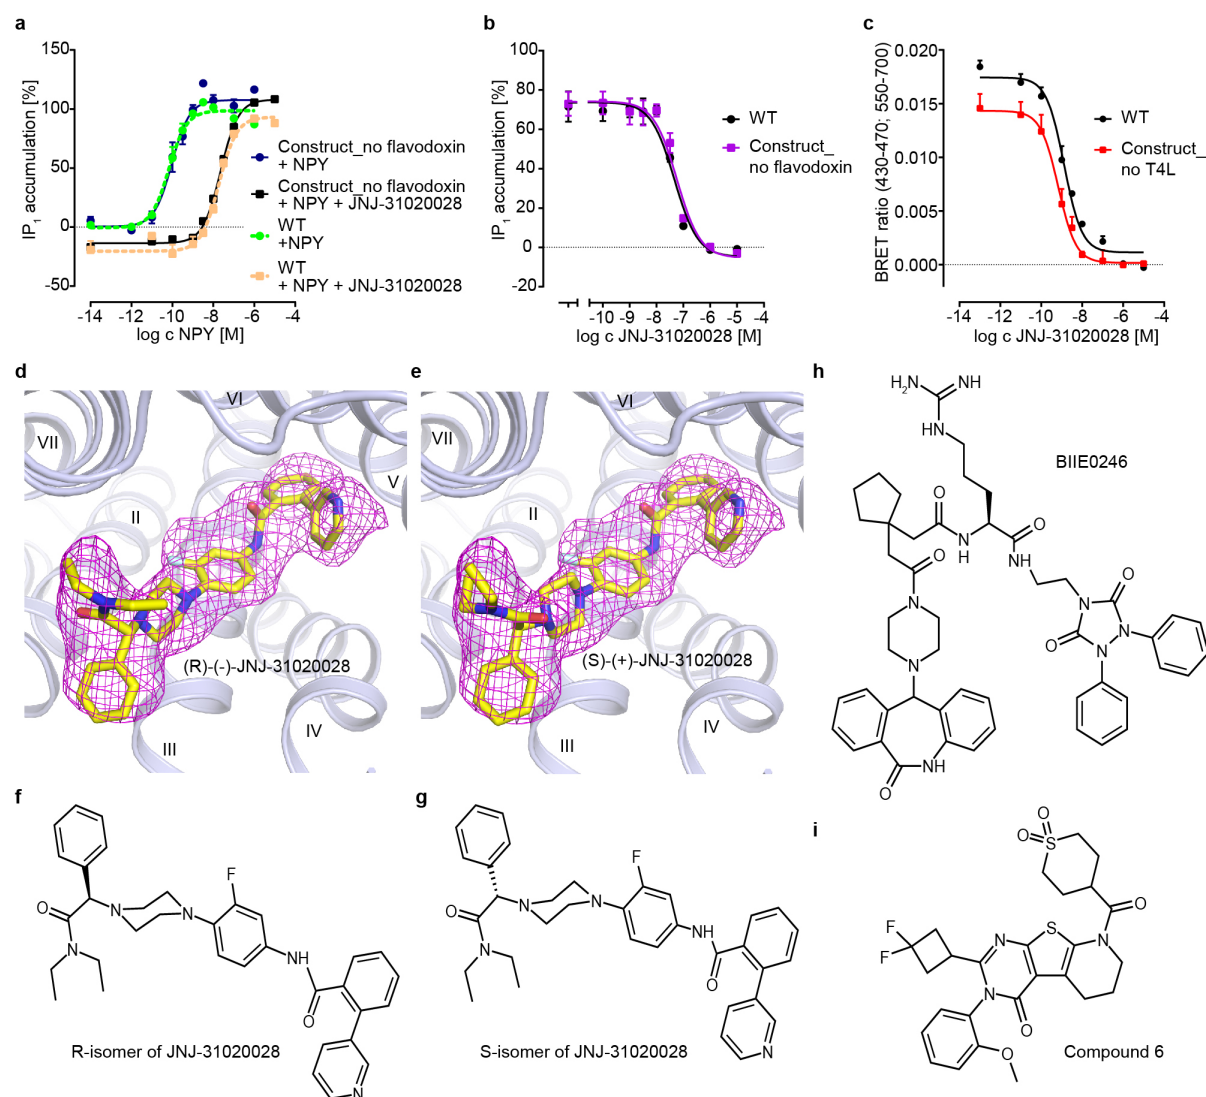

### Supplementary Figure 1. Function validation of crystallization construct, electron

densities of JNJ-31020028, and chemical structures of Y<sub>2</sub>R antagonists. **a**, NPY-induced

IP accumulation of Y<sub>2</sub>R in the absence or presence of 1 μM JNJ-31020028. “Construct\_no

flavodoxin” indicates the modified Y<sub>2</sub>R protein used for crystallization except that the ICL3-

flavodoxin fusion was removed to allow G protein coupling. WT, wild-type Y<sub>2</sub>R. Data are

shown as mean ± SEM from at least four independent experiments performed in triplicate. See

Supplementary Table 2 for detailed statistical evaluation. **b**, Inhibition of NPY-induced IP

accumulation of Y<sub>2</sub>R by JNJ-31020028. A fixed concentration of NPY (0.3 nM, ~ EC<sub>80</sub>) was

used to stimulate IP accumulation. Data are shown as mean  $\pm$  SEM from three independent experiments performed in triplicate (WT:  $IC_{50} = 4.8$  nM,  $pIC_{50} \pm SEM = 7.32 \pm 0.10$ ; construct\_no flavodoxin:  $IC_{50} = 6.0$  nM,  $pIC_{50} \pm SEM = 7.22 \pm 0.10$ ). Data are normalized to the actual effective concentration ( $EC_x$ ) at the day of the assay. **c**, NanoBRET-based binding assay of wild-type  $Y_2R$  (WT) and the modified  $Y_2R$  protein. “Construct\_no T4L” indicates the modified  $Y_2R$  protein used for crystallization except that the N-terminal T4L fusion was removed to ensure suitable distance for BRET. Data are shown as mean  $\pm$  SEM from three independent experiments performed in triplicate (WT:  $IC_{50} = 1.3$  nM,  $pIC_{50} \pm SEM = 8.89 \pm 0.08$ ; construct\_no T4L:  $IC_{50} = 0.7$  nM,  $pIC_{50} \pm SEM = 9.17 \pm 0.13$ ). **d** and **e**, Electron densities of JNJ-31020028. **d**, R-isomer; **e**, S-isomer. Electron densities are contoured at  $3.0 \sigma$  from a  $|F_o| - |F_c|$  omit map and colored magenta. **f-i**, Chemical structures of representative antagonists of  $Y_2R$ . **f**, R-isomer of JNJ-31020028; **g**, S-isomer of JNJ-31020028; **h**, BIIE0246; **i**, Compound 6. Source data for panels a-c are provided as a Source Data file.

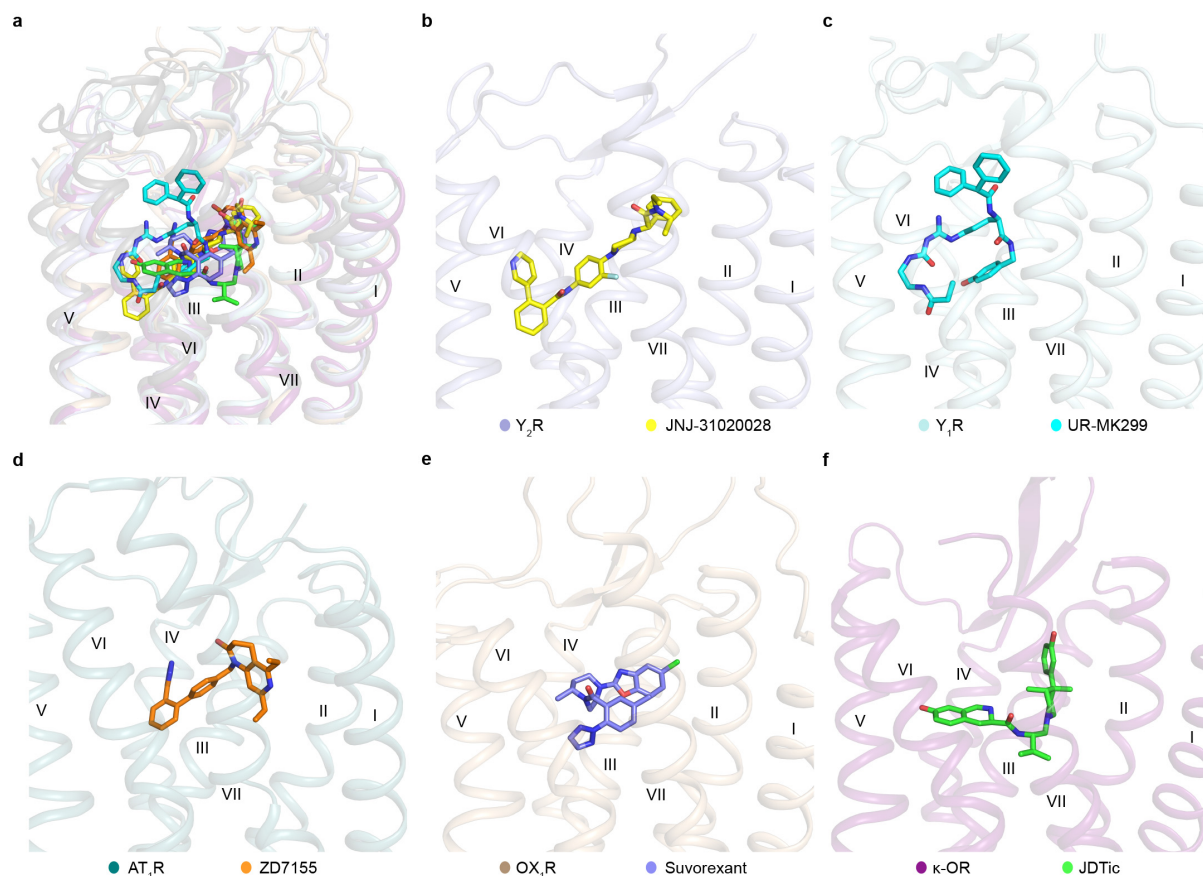

**Supplementary Figure 2. Comparison of ligand-binding pockets in some class A peptide**

**GPCR structures. a,** Comparison of ligand-binding sites in  $Y_2R$ ,  $Y_1R$ ,  $AT_1R$ ,  $OX_1R$  and  $\kappa$ -OR.

The structures of  $Y_2R$ -JNJ-31020028,  $Y_1R$ -UR-MK299 (PDB code: 5ZBQ),  $AT_1R$ -ZD7155

(PDB code: 4YAY),  $OX_1R$ -suvorexant (PDB code: 4ZJ8) and  $\kappa$ -OR-JDTic (PDB code: 4DJH)

are shown in cartoon representation and colored light blue, light cyan, green, gold, and purple,

respectively. The ligands are shown as yellow, cyan, orange, blue, and green sticks, respectively.

**b-f,** A close side view of the ligand in the binding pocket in each structure.

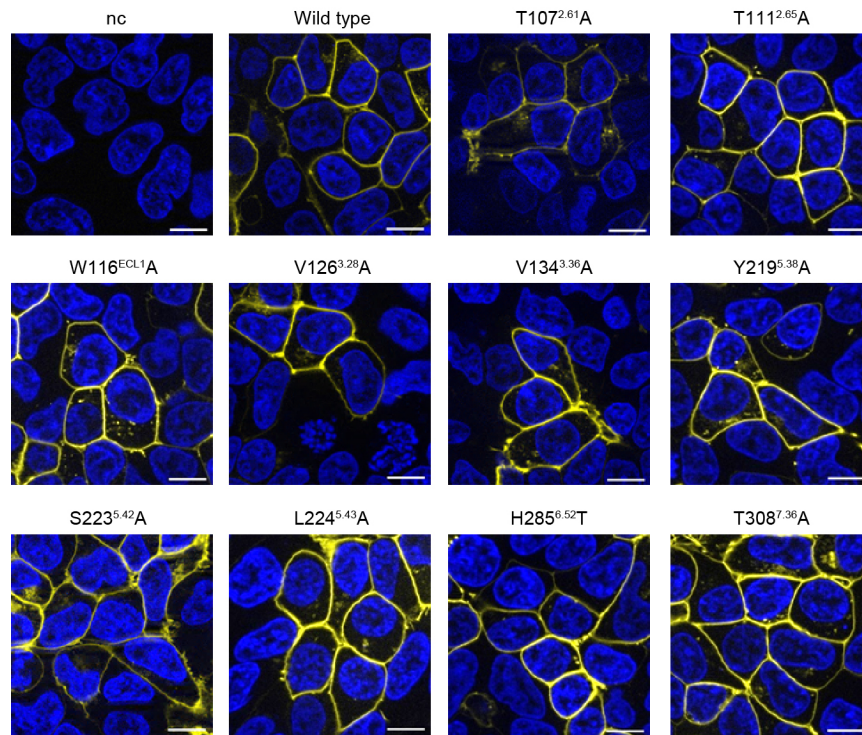

**Supplementary Figure 3. Live-cell fluorescence microscopy of the wild-type Y<sub>2</sub>R and several mutated receptor variants in transiently transfected HEK293 cells.** All receptor variants were predominantly expressed in the cell membrane comparable to the wild-type receptor. The appropriate expression of the remaining mutants was already verified in previous studies<sup>1,2,3</sup>. Pictures are representative of two independent experiments with similar results. nc, negative control. Scale bars, 10 μm.

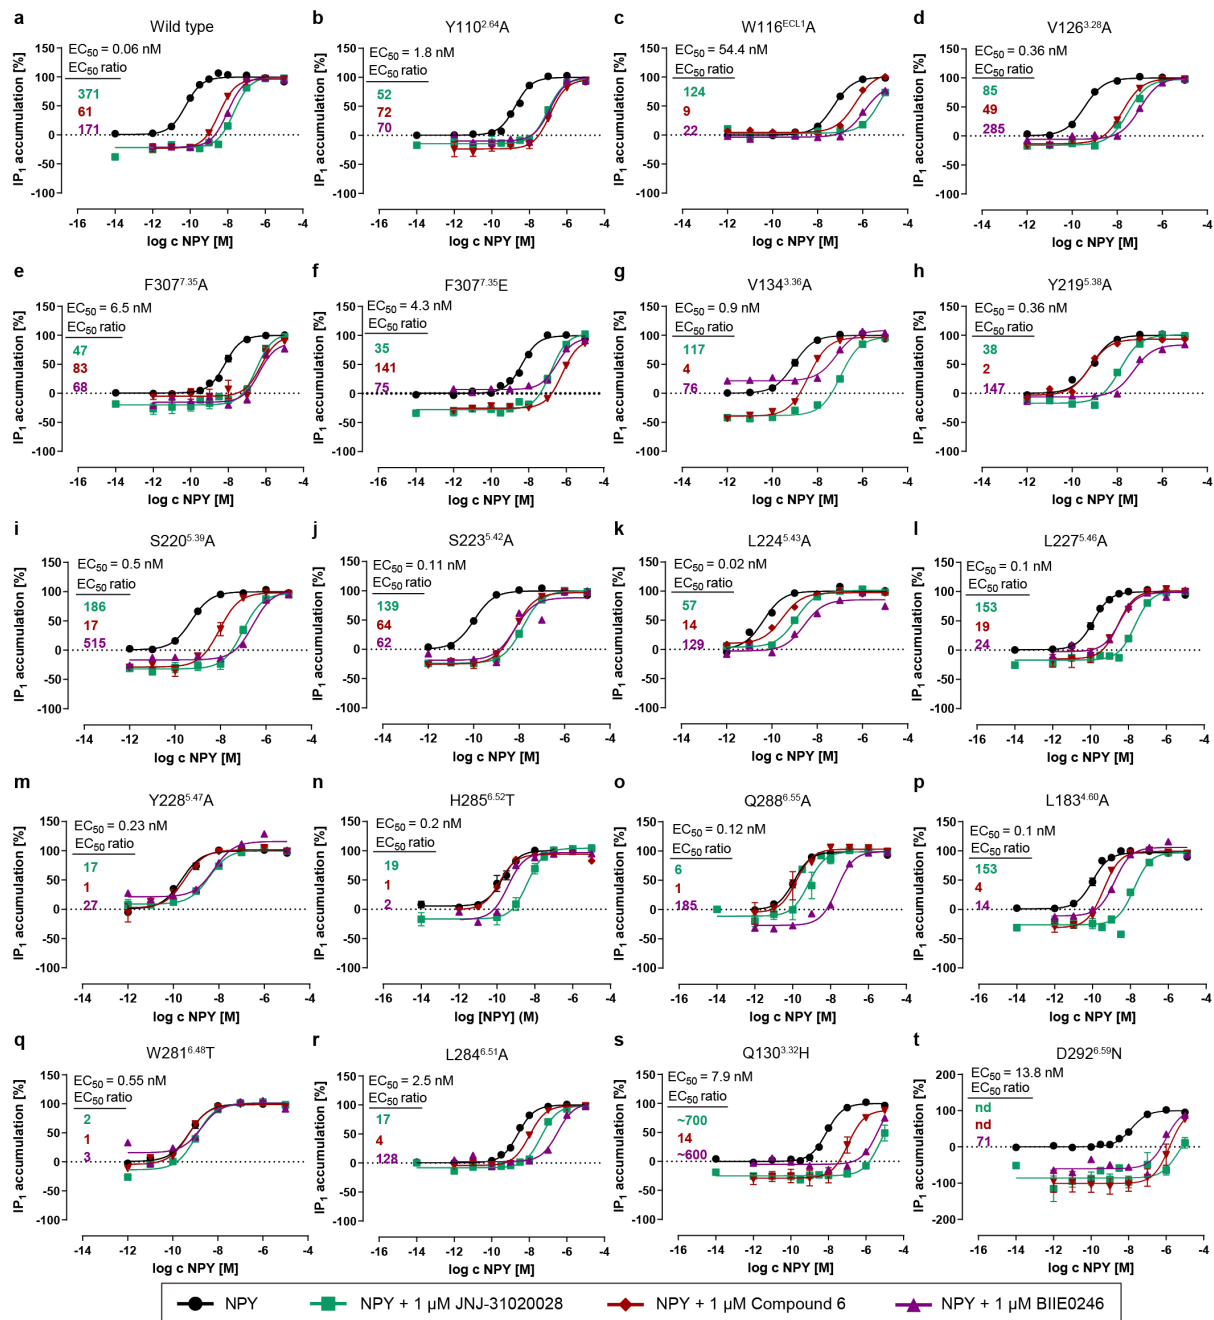

**Supplementary Figure 4. IP accumulation assays.** IP accumulation of wild-type and mutant Y<sub>2</sub> receptors induced by NPY (black) or NPY with the presence of antagonist JNJ-31020028 (1 μM, green), Compound 6 (1 μM, red) or BIIE0246 (1 μM, purple). At least two independent experiments were performed in triplicate. Where more than two experiments were performed, data are shown as mean ± SEM. Where two experiments were performed, data from a representative experiment are shown. See Supplementary Table 2 for detailed statistical

evaluation. **a**, Wild type; **b**, Y110<sup>2.64</sup>A; **c**, W116<sup>ECL1</sup>A; **d**, V126<sup>3.28</sup>A; **e**, F307<sup>7.35</sup>A; **f**, F307<sup>7.35</sup>E; **g**, V134<sup>3.36</sup>A; **h**, Y219<sup>5.38</sup>A; **i**, S220<sup>5.39</sup>A; **j**, S223<sup>5.42</sup>A; **k**, L224<sup>5.43</sup>A; **l**, L227<sup>5.46</sup>A; **m**, Y228<sup>5.47</sup>A; **n**, H285<sup>6.52</sup>T; **o**, Q288<sup>6.55</sup>A; **p**, L183<sup>4.60</sup>A; **q**, W281<sup>6.48</sup>T; **r**, L284<sup>6.51</sup>A; **s**, Q130<sup>3.32</sup>H; **t**, D292<sup>6.59</sup>N. EC<sub>50</sub> values of NPY (black) and EC<sub>50</sub> ratios (EC<sub>50</sub> (NPY+antagonist)/EC<sub>50</sub> (NPY)) for antagonists (JNJ-31020028, green; Compound 6, red; BIIE0246, purple) are shown in the top left corner for each graph. A reduced EC<sub>50</sub> ratio of the mutant compared to the wild-type receptor was interpreted as important for the respective antagonist. Source data are provided as a Source Data file.



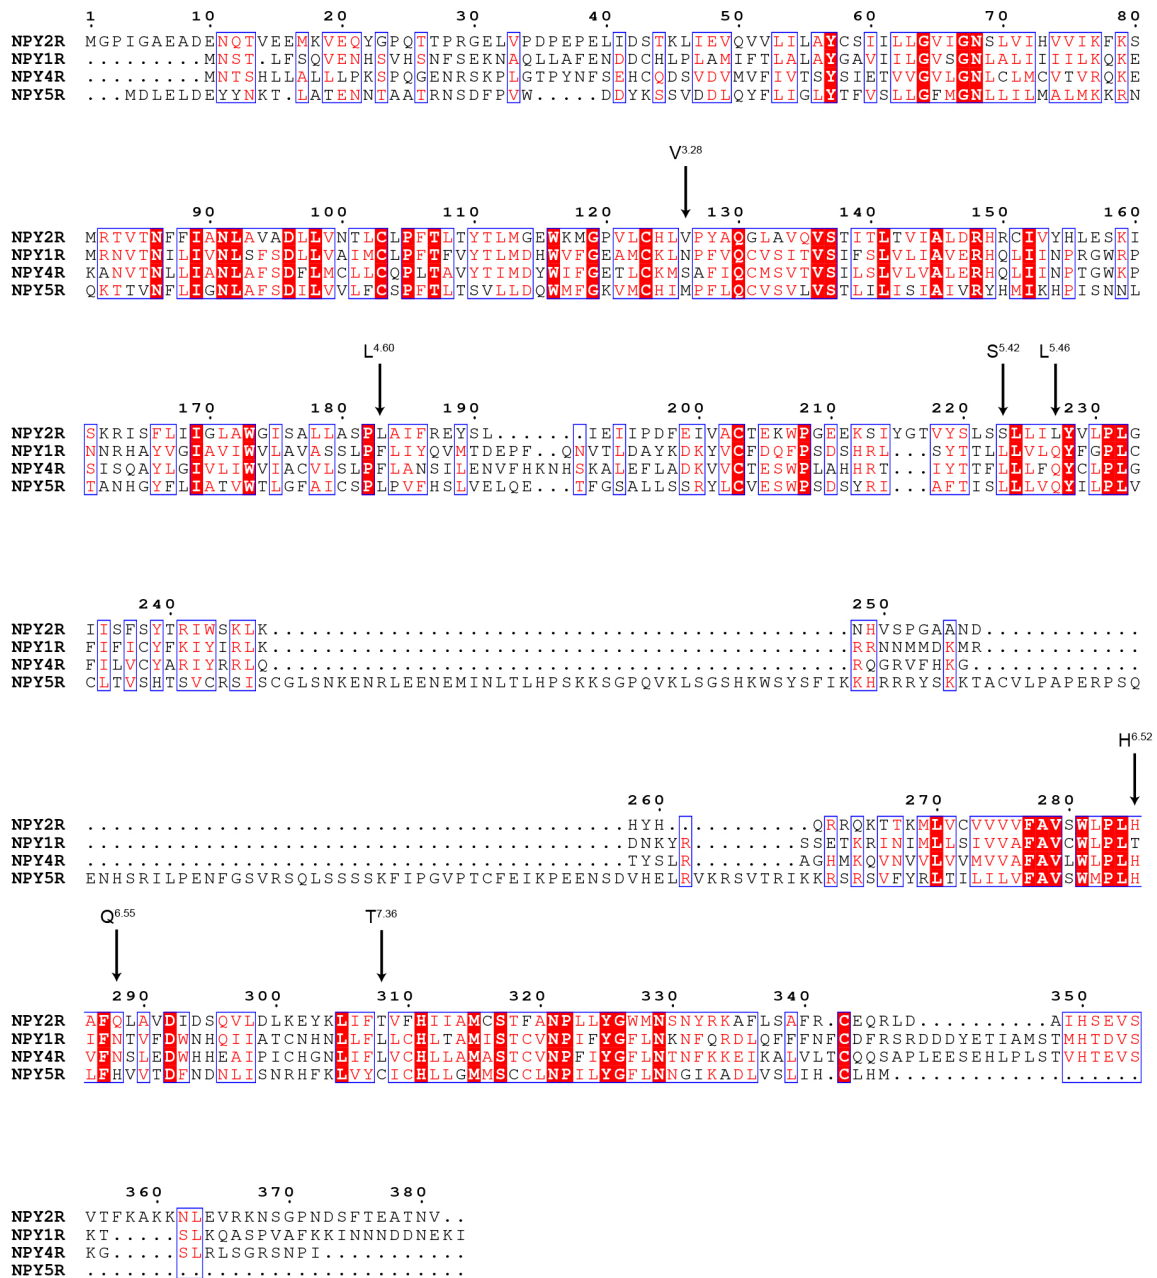

**Supplementary Figure 5. Sequence alignment of the human NPY receptors.** Sequence alignment of four human NPY receptors was performed by using align tools in UniProt database (<http://www.uniprot.org/align/>). The sequence conservation graph was prepared using the program ESPrnt 3.0 (<http://esprnt.ibcp.fr/ESPrnt/cgi-bin/ESPrnt.cgi>). The key Y<sub>2</sub>R residues that are involved in JNJ-31020028 binding and variable in the NPY receptors are marked with black arrows.



**Supplementary Table 1. Data collection and refinement statistics**

| <b>Y<sub>2</sub>R–JNJ-31020028</b>                      |                                    |
|---------------------------------------------------------|------------------------------------|
| <b>Data collection<sup>a</sup></b>                      |                                    |
| Space group                                             | <i>C</i> 2                         |
| Cell dimensions                                         |                                    |
| <i>a</i> , <i>b</i> , <i>c</i> (Å)                      | 96.4, 50.9, 184.6                  |
| $\alpha$ , $\beta$ , $\gamma$ (°)                       | 90.0, 90.7, 90.0                   |
| Resolution (Å)                                          | 50.0-2.80 (2.90-2.80) <sup>b</sup> |
| <i>R</i> <sub>pim</sub> (%)                             | 11.2 (51.7)                        |
| <i>I</i> / $\sigma$ ( <i>I</i> )                        | 12.1 (1.6)                         |
| Completeness (%)                                        | 98.4 (97.2)                        |
| Redundancy                                              | 5.4 (4.1)                          |
| <b>Refinement</b>                                       |                                    |
| Resolution (Å)                                          | 37.7-2.80                          |
| No. reflections                                         | 21,815 (1,878)                     |
| <i>R</i> <sub>work</sub> / <i>R</i> <sub>free</sub> (%) | 25.5 / 28.9                        |
| No. atoms                                               |                                    |
| Protein                                                 | 3,415                              |
| Ligand                                                  | 42                                 |
| <i>B</i> -factors (Å <sup>2</sup> )                     |                                    |
| Protein                                                 | 71.1                               |
| Ligand                                                  | 70.3                               |
| R.m.s. deviations                                       |                                    |
| Bond lengths (Å)                                        | 0.011                              |
| Bond angles (°)                                         | 1.212                              |
| Ramachandran plot (%)                                   |                                    |
| Favored                                                 | 96.3                               |
| Allowed                                                 | 3.7                                |
| Disallowed                                              | 0.0                                |

<sup>a</sup>Diffraction data from 52 crystals of Y<sub>2</sub>R–JNJ-31020028 were used to solve the structure.

<sup>b</sup>Numbers in parentheses refer to the highest-resolution shell.

**Supplementary Table 2. IP accumulation of wild-type (WT) and mutant Y<sub>2</sub> receptors for NPY and antagonists.**

| Mutants                | NPY                                                             |                |  | NPY/JNJ-31020028 (1 μM)                            |                    |                                  | NPY/Compound 6 (1 μM) |                                                    |             |                     | NPY/BIIIE0246 (1 μM) |                                                    |                   |                     |   |
|------------------------|-----------------------------------------------------------------|----------------|--|----------------------------------------------------|--------------------|----------------------------------|-----------------------|----------------------------------------------------|-------------|---------------------|----------------------|----------------------------------------------------|-------------------|---------------------|---|
|                        | EC <sub>50</sub> (nM)<br>(pEC <sub>50</sub> ± SEM) <sup>a</sup> | n <sup>b</sup> |  | EC <sub>50</sub> (nM)<br>(pEC <sub>50</sub> ± SEM) | Ratio <sup>c</sup> | Ratio change (fold) <sup>d</sup> | n                     | EC <sub>50</sub> (nM)<br>(pEC <sub>50</sub> ± SEM) | Ratio       | Ratio change (fold) | n                    | EC <sub>50</sub> (nM)<br>(pEC <sub>50</sub> ± SEM) | Ratio             | Ratio change (fold) | n |
| WT                     | 0.06<br>(10.24 ± 0.04)                                          | 13             |  | 21<br>(7.67 ± 0.06)                                | 371                | 1                                | 8                     | 3.5<br>(8.46 ± 0.07)                               | 61          | 1                   | 8                    | 9.1<br>(8.2; 9.8)                                  | 159<br>(144; 171) | 1                   | 2 |
| Construct <sup>e</sup> | 0.09<br>(10.02 ± 0.10)                                          | 5              |  | 23<br>(7.65 ± 0.14)                                | 237                | 1.6                              | 4                     | /                                                  | /           | /                   | /                    | /                                                  | /                 | /                   | / |
| Y110 <sup>2.64</sup> A | 1.8<br>(8.75 ± 0.04)                                            | 9              |  | 94<br>(7.03 ± 0.09)                                | 52                 | 7                                | 3                     | 129<br>(6.89 ± 0.11)                               | 72          | 0.8                 | 3                    | 45; 126                                            | 25;<br>70         | 6; 2                | 2 |
| T111 <sup>2.65</sup> A | 2.0<br>(1.3; 2.9)                                               | 2              |  | 513; 1,715                                         | 257;<br>860        | 1.4; 0.4                         | 2                     | 89; 82                                             | 45;<br>41   | 1.4; 1.5            | 2                    | 530; 459                                           | 265;<br>230       | 0.6; 0.7            | 2 |
| W116 <sup>ECL1</sup> A | 54<br>(58; 51)                                                  | 2              |  | 6,727; 4,442                                       | 124;<br>82         | 3; 5                             | 2                     | 490; 330                                           | 9; 6        | 7; 10               | 2                    | 1,180;<br>2,974                                    | 22;<br>55         | 7; 3                | 2 |
| V126 <sup>3.28</sup> A | 0.36<br>(9.45 ± 0.06)                                           | 4              |  | 36; 30                                             | 100;<br>85         | 4; 4                             | 2                     | 18; 12                                             | 49;<br>34   | 1.2; 1.8            | 2                    | 102; 114                                           | 285;<br>320       | 0.6; 0.5            | 2 |
| V126 <sup>3.28</sup> N | 5.5<br>(8.26 ± 0.12)                                            | 4              |  | 570<br>(6.24 ± 0.15)                               | 104                | 4                                | 4                     | /                                                  | /           | /                   | /                    | /                                                  | /                 | /                   | / |
| Q130 <sup>3.32</sup> H | 7.9<br>(8.10 ± 0.05)                                            | 8              |  | nd                                                 | nd                 | nd                               | 3                     | 113<br>(6.95 ± 0.16)                               | 14          | 4                   | 3                    | nd                                                 | nd                | nd                  | 2 |
| V134 <sup>3.36</sup> A | 0.90<br>(9.04 ± 0.05)                                           | 4              |  | 106; 73                                            | 117;<br>80         | 3; 5                             | 2                     | 4.0; 4.4                                           | 4; 5        | 15; 12              | 2                    | 69; 79                                             | 76;<br>87         | 2; 1.8              | 2 |
| L183 <sup>4.60</sup> A | 0.10<br>(9.99 ± 0.07)                                           | 8              |  | 16<br>(7.81 ± 0.10)                                | 153                | 2                                | 3                     | 0.40<br>(9.41 ± 0.07)                              | 3.8         | 16                  | 3                    | 0.65; 1.5                                          | 6; 14             | 27; 11              | 2 |
| L183 <sup>4.60</sup> F | 0.23<br>(9.64 ± 0.14)                                           | 4              |  | 124<br>(6.91 ± 0.11)                               | 535                | 0.7                              | 4                     | /                                                  | /           | /                   | /                    | /                                                  | /                 | /                   | / |
| Y219 <sup>5.38</sup> A | 0.36<br>(0.76; 0.23)                                            | 2              |  | 14; 18                                             | 38;<br>50          | 10; 7                            | 2                     | 0.99; 0.62                                         | 3; 2        | 20; 31              | 2                    | 18; 53                                             | 49;<br>147        | 3; 1                | 2 |
| S220 <sup>5.39</sup> A | 0.52<br>(9.29 ± 0.06)                                           | 6              |  | 97<br>(7.02 ± 0.09)                                | 186                | 2                                | 4                     | 9.0<br>(8.05 ± 0.09)                               | 17          | 4                   | 4                    | 267; 254                                           | 515;<br>490       | 0.3; 0.3            | 2 |
| S223 <sup>5.42</sup> A | 0.11<br>(9.98 ± 0.05)                                           | 6              |  | 14<br>(7.83 ± 0.05)                                | 139                | 3                                | 4                     | 6.7<br>(8.17 ± 0.07)                               | 64          | 1                   | 4                    | 29; 6.5                                            | 276;<br>62        | 0.6; 3              | 2 |
| S223 <sup>5.42</sup> L | 0.23<br>(9.64 ± 0.10)                                           | 4              |  | 197<br>(6.71 ± 0.13)                               | 865                | 0.4                              | 4                     | /                                                  | /           | /                   | /                    | /                                                  | /                 | /                   | / |
| L224 <sup>5.43</sup> A | 0.02<br>(0.04; 0.01)                                            | 2              |  | 1.2; 2.6                                           | 57;<br>126         | 7; 3                             | 2                     | 0.29; 0.49                                         | 14;<br>24   | 4; 3                | 2                    | 28; 2.6                                            | 1,349;<br>129     | 0.1; 1.2            | 2 |
| L227 <sup>5.46</sup> A | 0.14<br>(9.84 ± 0.05)                                           | 9              |  | 22<br>(7.65 ± 0.07)                                | 153                | 2                                | 5                     | 2.8<br>(8.55 ± 0.13)                               | 19          | 3                   | 3                    | 4.6; 3.5                                           | 31;<br>24         | 5; 7                | 2 |
| L227 <sup>5.46</sup> Q | 0.14<br>(9.86 ± 0.15)                                           | 4              |  | 6.9<br>(8.16 ± 0.14)                               | 50                 | 7                                | 4                     | /                                                  | /           | /                   | /                    | /                                                  | /                 | /                   | / |
| Y228 <sup>5.47</sup> A | 0.23<br>(9.64 ± 0.07)                                           | 5              |  | 3.8<br>(8.42 ± 0.09)                               | 17                 | 22                               | 3                     | 0.32<br>(9.49 ± 0.14)                              | 1.4         | 44                  | 3                    | 2.4; 6.2                                           | 10;<br>27         | 16; 6               | 2 |
| W281 <sup>6.48</sup> T | 0.55<br>(9.26 ± 0.07)                                           | 5              |  | 1.1<br>(8.96 ± 0.07)                               | 2                  | 186                              | 3                     | 0.50<br>(9.30 ± 0.08)                              | 0.9         | 68                  | 3                    | 1.8; 1.1                                           | 3; 2              | 48; 80              | 2 |
| L284 <sup>6.51</sup> A | 2.5<br>(8.60 ± 0.03)                                            | 8              |  | 42<br>(7.37 ± 0.06)                                | 17                 | 22                               | 3                     | 10<br>(7.99 ± 0.05)                                | 4           | 15                  | 3                    | 223; 322                                           | 89;<br>128        | 1.8; 1.2            | 2 |
| H285 <sup>6.52</sup> T | 0.20<br>(9.69 ± 0.10)                                           | 3              |  | 3.9<br>(8.41 ± 0.13)                               | 19                 | 20                               | 3                     | 0.26; 0.09                                         | 1.3;<br>0.4 | 47; 153             | 2                    | 0.72; 0.38                                         | 4;<br>1.9         | 45; 84              | 2 |
| Q288 <sup>6.55</sup> A | 0.12<br>(9.92 ± 0.07)                                           | 8              |  | 0.68<br>(9.17 ± 0.18)                              | 6                  | 65                               | 3                     | 0.16<br>(9.81 ± 0.19)                              | 1.3         | 47                  | 3                    | 12; 22                                             | 102;<br>185       | 1.6; 0.9            | 2 |
| Q288 <sup>6.55</sup> N | 0.14<br>(9.86 ± 0.11)                                           | 4              |  | 0.29<br>(9.54 ± 0.13)                              | 2                  | 186                              | 4                     | /                                                  | /           | /                   | /                    | /                                                  | /                 | /                   | / |
| D292 <sup>6.59</sup> N | 14<br>(7.86 ± 0.05)                                             | 8              |  | nd                                                 | nd                 | nd                               | 3                     | nd                                                 | nd          | nd                  | 3                    | 970; 865                                           | 71;<br>63         | 2; 3                | 2 |
| F307 <sup>7.35</sup> A | 6.5<br>(8.19 ± 0.05)                                            | 8              |  | 305<br>(6.52 ± 0.13)                               | 47                 | 8                                | 3                     | 540<br>(6.27 ± 0.23)                               | 83          | 0.7                 | 3                    | 443; 723                                           | 68;<br>111        | 2; 1.4              | 2 |
| F307 <sup>7.35</sup> E | 4.3<br>(8.36 ± 0.09)                                            | 9              |  | 151<br>(6.82 ± 0.07)                               | 35                 | 11                               | 3                     | 655; 615                                           | 151;<br>141 | 0.4; 0.4            | 2                    | 327; 1,693                                         | 75;<br>389        | 2; 0.4              | 2 |
| T308 <sup>7.36</sup> A | 0.25<br>(0.34; 0.20)                                            | 2              |  | 171; 161                                           | 695;<br>655        | 0.5; 0.6                         | 2                     | 24; 28                                             | 99;<br>112  | 0.6; 0.5            | 2                    | 61; 54                                             | 248;<br>219       | 0.6; 0.7            | 2 |
| T308 <sup>7.36</sup> L | 0.12<br>(9.92 ± 0.14)                                           | 4              |  | 54<br>(7.27 ± 0.12)                                | 454                | 0.8                              | 4                     | /                                                  | /           | /                   | /                    | /                                                  | /                 | /                   | / |

<sup>a</sup>Data are shown as mean ± SEM from at least three independent experiments or the results of two individual experiments each performed in triplicate. nd, not determined. /, not tested.

<sup>b</sup>Sample size; the number of independent experiments performed in triplicate.

<sup>c</sup>The EC<sub>50</sub> ratio refers to the shift between the NPY and NPY + 1 μM antagonist curve ( $EC_{50(NPY + antagonist)}/EC_{50(NPY)}$ ) and characterizes the antagonistic effect on the wild-type receptor or receptor mutants. By comparison of EC<sub>50</sub> ratios between wild-type and mutant receptors, influences of all tested residues on antagonistic activity were determined. A higher ratio indicates higher antagonistic activity. A reduced EC<sub>50</sub> ratio of mutant compared to the wild-type receptor was interpreted as important for the respective antagonist.

<sup>d</sup>Fold change of EC<sub>50</sub> ratio refers to EC<sub>50</sub> ratio (WT)/EC<sub>50</sub> ratio (mutant).

<sup>e</sup>“Construct” indicates the modified Y<sub>2</sub>R protein used for crystallization except that the ICL3-flavodoxin fusion was removed to allow G protein coupling.

Source data are provided as a Source Data file.

**Supplementary Table 3. Primers used in this work.**

|                               | Primer sequences (5'-3')                  |
|-------------------------------|-------------------------------------------|
| Y <sub>2</sub> R-WT-F         | ATTGGCGCGCCGATGGGACCAATCGGAGCAGAAGCA      |
| T4L-F                         | ATTGGCGCGCCGAACATCTTCGAGATGCTGCGTATC      |
| Y <sub>2</sub> R-T4L-R        | TGCTCCGATTGGTCCCATGTAAGCGTCCCATGTACC      |
| T4L-Y <sub>2</sub> R-F        | GGTACATGGGACGCTTACATGGGACCAATCGGAGCA      |
| Flavodoxin-F                  | AAGCTGAAAAACCACGTCGCCAAGGCTCTCATCGTG      |
| Flavodoxin-R                  | GCGTGATGGTAGTGGTCAATAGCGCCCCTCACGTC       |
| Flavodoxin-Y <sub>2</sub> R-F | GACGTGAGGGGCGCTATTGACCACTACCATCAGCGC      |
| Flavodoxin-Y <sub>2</sub> R-R | CACGATGAGAGCCTTGGCGACGTGGTTTTTCAGCTT      |
| C-truncation-R                | ATTGAATTCGACTTCGGAGTGGATTGCGTCCAAACG      |
| Y110A-F                       | CTCTTACCgctACCTTAATGGGGGAGTGGAAA          |
| Y110A-R                       | TAAGGTAgcGGTAAGAGTGAACGGTAGACACAGAG       |
| T111A-F                       | ACCTATgccTTAATGGGGGAGTGGAAAATGGG          |
| T111A-R                       | CCCATTAaggcATAGGTAAGAGTGAACGGTAGACACAG    |
| W116A-F                       | ATGGGGGAGgcgAAAATGGGTCCTGTCCTGTGC         |
| W116A-R                       | ATTTTcgcCTCCCCATTAAGGTATAGGTAAGAG         |
| V126A-F                       | CCACCTGgcgCCCTATGCCCAGGGCCTGGCAG          |
| V126A-R                       | CATAGGGgcgCAGGTGGCACAGGACAGGACCC          |
| V126N-F                       | CCACCTGaacCCCTATGCCCAGGGCCTGGCAG          |
| V126N-R                       | CATAGGGggttCAGGTGGCACAGGACAGGACCC         |
| Q130H-F                       | TGGTGCCCTATGCCcacGGCCTGGCAGTACAAGTATCCA   |
| Q130H-R                       | gtgGGCATAGGGCACCAGGTGGCACAGGACAG          |
| V134A-F                       | CCTGGCAgcaCAAGTATCCACAATCACCTTGACAG       |
| V134A-R                       | ATACTTGtgcTGCCAGGCCCTGGGCATAGGGC          |
| L183A-F                       | AAGTCCCgcgGCCATCTTCCGGGAGTATTCGC          |
| L183A-R                       | AGATGGCcgCGGACTTGCCAGCAGGGCACTG           |
| L183F-F                       | AAGTCCCttcGCCATCTTCCGGGAGTATTCGC          |
| L183F-R                       | AGATGGCgaaGGGACTTGCCAGCAGGGCACTG          |
| Y219A-F                       | CACTGTCgctAGTCTTTCTTCCTTGTTGATCTTGTATG    |
| Y219A-R                       | AAAGACTAgcGACAGTGCCATAGATGCTCTTCTC        |
| S220A-F                       | GCACTGTCTATgetCTTTCTTCCTTGTTGATCTTGTATGTT |
| S220A-R                       | AAGagcATAGACAGTGCCATAGATGCTCTTCT          |
| S223A-F                       | GTCTTTCTgccTTGTTGATCTTGTATGTTTTGCCTC      |
| S223A-R                       | CAACAaggcAGAAAGACTATAGACAGTGCCATAGATGC    |
| S223L-F                       | GTCTTTCTctcTTGTTGATCTTGTATGTTTTGCCTC      |
| S223L-R                       | CAACAagagAGAAAGACTATAGACAGTGCCATAGATGC    |
| L224A-F                       | TTCTTCCgcgTTGATCTTGTATGTTTTGCCTCTGG       |
| L224A-R                       | AGATCAAcgcGGAAGAAAGACTATAGACAGTGCCATA     |
| L227A-F                       | CTTGTTGATCgcgTATGTTTTGCCTCTGGGCATTA       |

---

|         |                                               |
|---------|-----------------------------------------------|
| L227A-R | CATAcgcGATCAACAAGGAAGAAAGACTATAGACAG          |
| L227Q-F | CcagTATGTTTTGCCTCTGGGCATTATATCAT              |
| L227Q-R | GAGGCAAAACATActgGATCAACAAGGAAGAAAGACTATAGACAG |
| Y228A-F | GATCTTGgctGTTTTGCCTCTGGGCATTATATC             |
| Y228A-R | GCAAAACcagCAAGATCAACAAGGAAGAAAGACTATAGA       |
| W281T-F | TTTGCGGTCAGCacgCTGCCTCTCCATGCCTTCC            |
| W281T-R | AGcgtGCTGACCGCAAACACCACCACACACA               |
| L284A-F | CTGCCTgccCATGCCTTCCAGCTTGCCGTTGA              |
| L284A-R | AAGGCATGggcAGGCAGCCAGCTGACCGCAA               |
| H285T-F | TCactGCCTTCCAGCTTGCCGTTGACATTGAC              |
| H285T-R | AAGCTGGAAGGCagtGAGAGGCAGCCAGCTGACC            |
| Q288A-F | TCCATGCCTTCgegCTTGCCGTTGACATTGACAGC           |
| Q288A-R | AAGcgcGAAGGCATGGAGAGGCAGCCAGCTGA              |
| Q288N-F | ATGCCTTcaacCTTGCCGTTGACATTGACAGC              |
| Q288N-R | GGCAAGgttGAAGGCATGGAGAGGCAGCCAGC              |
| D292N-F | GCCGTTaacATTGACAGCCAGGTCCTGGACCT              |
| D292N-R | CTGTCAATgttAACGGCAAGCTGGAAGGCATG              |
| F307A-F | ACTCATCgccACAGTGTTCCACATCATCGCCA              |
| F307A-R | ACACTGTggcGATGAGTTTGTACTCCTTCAGGTCC           |
| F307E-F | ACTCATCgagACAGTGTTCCACATCATCGCCA              |
| F307E-R | ACACTGTetcGATGAGTTTGTACTCCTTCAGGTCC           |
| T308A-F | CATCTTCgcaGTGTTCCACATCATCGCCATGT              |
| T308A-R | GGAACActgcGAAGATGAGTTTGTACTCCTTCAGGTC         |
| T308L-F | CATCTTCctaGTGTTCCACATCATCGCCATGT              |
| T308L-R | GGAACActagGAAGATGAGTTTGTACTCCTTCAGGTC         |

---

## Supplementary references

1. Burkert, K. et al. A deep hydrophobic binding cavity is the main interaction for different Y<sub>2</sub>R antagonists. *ChemMedChem* **12**, 75-85 (2017).
2. Kaiser, A. et al. G protein preassembly rescues efficacy of W<sup>6,48</sup> toggle mutations in neuropeptide Y<sub>2</sub> receptor. *Mol. Pharmacol.* **93**, 387-401 (2018).
3. Kaiser, A. et al. Unwinding of the C-terminal residues of neuropeptide Y is critical for Y<sub>2</sub> receptor binding and activation. *Angew. Chem.* **54**, 7446-7449 (2015).
