# Supplementary material for: Structural basis for ligand recognition of the neuropeptide Y Y2 receptor
Source: PubMed Central journal article supplement (PMC7854658; doi:10.1038/s41467-021-21030-9), 2021-02-02
Supplement: 41467_2021_21030_MOESM3_ESM.pdf [file 41467_2021_21030_MOESM3_ESM.pdf]

## Reporting Summary

Nature Research wishes to improve the reproducibility of the work that we publish. This form provides structure for consistency and transparency in reporting. For further information on Nature Research policies, see our [Editorial Policies](#) and the [Editorial Policy Checklist](#).

### Statistics

For all statistical analyses, confirm that the following items are present in the figure legend, table legend, main text, or Methods section.

n/a Confirmed

- The exact sample size ( $n$ ) for each experimental group/condition, given as a discrete number and unit of measurement
- A statement on whether measurements were taken from distinct samples or whether the same sample was measured repeatedly
- The statistical test(s) used AND whether they are one- or two-sided  
*Only common tests should be described solely by name; describe more complex techniques in the Methods section.*
- A description of all covariates tested
- A description of any assumptions or corrections, such as tests of normality and adjustment for multiple comparisons
- A full description of the statistical parameters including central tendency (e.g. means) or other basic estimates (e.g. regression coefficient) AND variation (e.g. standard deviation) or associated estimates of uncertainty (e.g. confidence intervals)
- For null hypothesis testing, the test statistic (e.g.  $F$ ,  $t$ ,  $r$ ) with confidence intervals, effect sizes, degrees of freedom and  $P$  value noted  
*Give  $P$  values as exact values whenever suitable.*
- For Bayesian analysis, information on the choice of priors and Markov chain Monte Carlo settings
- For hierarchical and complex designs, identification of the appropriate level for tests and full reporting of outcomes
- Estimates of effect sizes (e.g. Cohen's  $d$ , Pearson's  $r$ ), indicating how they were calculated

*Our web collection on [statistics for biologists](#) contains articles on many of the points above.*

### Software and code

Policy information about [availability of computer code](#)

Data collection No commercial and open source software was used for data collection.

Data analysis The following software was used in X-ray diffraction data processing and model building: HKL2000 (HKL-2000, v717), PHENIX (1.17.1-3660), COOT (0.8.9.1 EL), and Buster (BUSTER, RhoFit, Gelly, Grade, buster-report and Pipedream). The signaling data were analysed by GraphPad Prism 5. The LigPlot+ v.2.1 and ESPript 3.0 were used to analyse the receptor-ligand interaction and sequence alignment.

For manuscripts utilizing custom algorithms or software that are central to the research but not yet described in published literature, software must be made available to editors and reviewers. We strongly encourage code deposition in a community repository (e.g. GitHub). See the Nature Research [guidelines for submitting code & software](#) for further information.

### Data

Policy information about [availability of data](#)

All manuscripts must include a [data availability statement](#). This statement should provide the following information, where applicable:

- Accession codes, unique identifiers, or web links for publicly available datasets
- A list of figures that have associated raw data
- A description of any restrictions on data availability

Atomic coordinates and structure factors of the Y2R-JNJ-31020028 structure have been deposited in the Protein Data Bank under accession code 7DDZ [<https://www.rcsb.org/structure/unreleased/7DDZ>]. The source data underlying Fig. 3, Supplementary Fig. 1a-c, Supplementary Fig. 4, and Supplementary Table 2 are provided as a Source Data file. All relevant data are available from the corresponding authors upon reasonable request.

## Field-specific reporting

Please select the one below that is the best fit for your research. If you are not sure, read the appropriate sections before making your selection.

Life sciences       Behavioural & social sciences       Ecological, evolutionary & environmental sciences

For a reference copy of the document with all sections, see [nature.com/documents/nr-reporting-summary-flat.pdf](https://www.nature.com/documents/nr-reporting-summary-flat.pdf)

## Life sciences study design

All studies must disclose on these points even when the disclosure is negative.

|                 |                                                                                                                                                                                                                                                                                                                                                                                                                                                                                                                                                                                                                                                        |
|-----------------|--------------------------------------------------------------------------------------------------------------------------------------------------------------------------------------------------------------------------------------------------------------------------------------------------------------------------------------------------------------------------------------------------------------------------------------------------------------------------------------------------------------------------------------------------------------------------------------------------------------------------------------------------------|
| Sample size     | Due to radiation damage, X-ray diffraction data collection of the protein crystals was limited to 5-10 degree per crystal. To collect a complete data set for structure determination, diffraction data from multiple crystals were integrated and scaled using HKL2000. By calculating completeness of the data set, diffraction data from 52 Y2R-JNJ-31020028 crystals were used to ensure the completeness was close to 100%. For IP accumulation and binding assays, no statistical approach was used to predetermine the sample size. At least two independent experiments were performed in triplicate to ensure each data point was repeatable. |
| Data exclusions | No data were excluded from the analyses.                                                                                                                                                                                                                                                                                                                                                                                                                                                                                                                                                                                                               |
| Replication     | Each experiment of IP accumulation and binding assays was reliably reproduced within one month and all attempts at replication were successful.                                                                                                                                                                                                                                                                                                                                                                                                                                                                                                        |
| Randomization   | Randomization is not relevant to this study, as protein and crystal samples are not required to be allocated into experimental groups in protein structural studies, and no animals or human research participants are involved in this study.                                                                                                                                                                                                                                                                                                                                                                                                         |
| Blinding        | Blinding is not relevant to this study, as protein and crystal samples are not required to be allocated into experimental groups in protein structural studies, and no animals or human research participants are involved in this study.                                                                                                                                                                                                                                                                                                                                                                                                              |

## Reporting for specific materials, systems and methods

We require information from authors about some types of materials, experimental systems and methods used in many studies. Here, indicate whether each material, system or method listed is relevant to your study. If you are not sure if a list item applies to your research, read the appropriate section before selecting a response.

### Materials & experimental systems

| n/a                                 | Included in the study                                     |
|-------------------------------------|-----------------------------------------------------------|
| <input type="checkbox"/>            | <input checked="" type="checkbox"/> Antibodies            |
| <input type="checkbox"/>            | <input checked="" type="checkbox"/> Eukaryotic cell lines |
| <input checked="" type="checkbox"/> | <input type="checkbox"/> Palaeontology and archaeology    |
| <input checked="" type="checkbox"/> | <input type="checkbox"/> Animals and other organisms      |
| <input checked="" type="checkbox"/> | <input type="checkbox"/> Human research participants      |
| <input checked="" type="checkbox"/> | <input type="checkbox"/> Clinical data                    |
| <input checked="" type="checkbox"/> | <input type="checkbox"/> Dual use research of concern     |

### Methods

| n/a                                 | Included in the study                           |
|-------------------------------------|-------------------------------------------------|
| <input checked="" type="checkbox"/> | <input type="checkbox"/> ChIP-seq               |
| <input checked="" type="checkbox"/> | <input type="checkbox"/> Flow cytometry         |
| <input checked="" type="checkbox"/> | <input type="checkbox"/> MRI-based neuroimaging |

## Antibodies

|                 |                                                                                                                                                                                                                                                                                                                    |
|-----------------|--------------------------------------------------------------------------------------------------------------------------------------------------------------------------------------------------------------------------------------------------------------------------------------------------------------------|
| Antibodies used | Cryptate-labeled anti-IP1 monoclonal antibody: CisBio Bioassays, Cat#62IPAPEB. Antibody was diluted in lysis and detection buffer (1:20) and described as required in Methods.                                                                                                                                     |
| Validation      | The antibody has been commercially obtained and validated by the vendor. Validation data are available from the respective manufacturer's website, <a href="https://www.cisbio.cn/ip-one-gq-kit-40451#section-products-tabs-product">https://www.cisbio.cn/ip-one-gq-kit-40451#section-products-tabs-product</a> . |

## Eukaryotic cell lines

Policy information about [cell lines](#)

|                          |                                                                                                                     |
|--------------------------|---------------------------------------------------------------------------------------------------------------------|
| Cell line source(s)      | The Sf9 cell line was obtained from Invitrogen. The HEK293 cell line was obtained from DMSZ, Braunschweig, Germany. |
| Authentication           | None of the cell lines has been authenticated.                                                                      |
| Mycoplasma contamination | The cell lines were negative for mycoplasma contamination.                                                          |

Commonly misidentified lines  
(See [ICLAC](#) register)

No commonly misidentified cell lines were used.
